# Supplementary material for: Ehrlich Tumor Induces TRPV1-Dependent Evoked and Non-Evoked Pain-like Behavior in Mice
Source: MDPI journal article supplement (doi:10.3390/brainsci12091247), 2022-09-15
Supplement: s1 [file s1]

**Table S1.** Statistical information from results shown in Figure 1.

| Result    |                       |                     |                | Shapiro-Wilk test |         | Brown-Forsythe |         | Statistical test |                          |           |         |
|-----------|-----------------------|---------------------|----------------|-------------------|---------|----------------|---------|------------------|--------------------------|-----------|---------|
|           | Group                 | N Animals per plate | N experimental | W value           | P value | F value        | P value |                  | Kruskal-Wallis statistic | Post-Test | P value |
| Figure 1E | WT+ Saline Baseline   | 10                  | 2              | 0,8475            | <0,0001 | 25,43 (3, 362) | <0,0001 | Kruskal-Wallis   | 338,6                    | Dunn      | <0,0001 |
|           | WT + Ehrlich Baseline | 10                  | 2              | 0,9361            | 0,0002  |                |         |                  |                          |           |         |
|           | WT+ Saline Caps       | 10                  | 2              | 0,7654            | <0,0001 |                |         |                  |                          |           |         |
|           | WT + Ehrlich Caps     | 10                  | 2              | 0,8072            | <0,0001 |                |         |                  |                          |           |         |
