# Supplementary material for: Ehrlich Tumor Induces TRPV1-Dependent Evoked and Non-Evoked Pain-like Behavior in Mice
Source: MDPI journal article supplement (doi:10.3390/brainsci12091247), 2022-09-15
Supplement: s1 [file s1]

| <b>Table S3.</b> Statistical information from results shown in Figure 3 |                        |    |                   |         |                |                         |         |                   |           |                                                 |          |
|-------------------------------------------------------------------------|------------------------|----|-------------------|---------|----------------|-------------------------|---------|-------------------|-----------|-------------------------------------------------|----------|
| Result                                                                  |                        |    | Shapiro-Wilk test |         | Brown-Forsythe |                         |         | Statistical tests |           |                                                 |          |
|                                                                         | Group                  | n  | W value           | P value | Time points    | F value<br>F (DFn, DFd) | P value | Test              | Post-Test | F value                                         | P value  |
| <b>Figure 3B</b>                                                        | WT + Saline            | 8  | 0,8688            | 0,2617  | Baseline       | 0,4078 (2, 21)          | 0,6703  | Two-way ANOVA     | Tukey     | Interaction<br>F (8, 84) = 45,37                | P<0,0001 |
|                                                                         |                        |    |                   |         | 0h             | 2,175 (2, 21)           | 0,1385  |                   |           | Row Factor /<br>Time<br>F(3,389, 71,17) = 43,21 | P<0,0001 |
|                                                                         | WT + Ehrlich + vehicle | 8  | 0,8586            | 0,2231  | 1h             | 0,4126 (2, 21)          | 0,6672  |                   |           | Colum Factor/<br>Group<br>F (2, 21) = 989,2     | P<0,0001 |
|                                                                         |                        |    |                   |         | 3h             | 0,5027 (2, 21)          | 0,6120  |                   |           | Subject<br>F (21, 84) = 1,495                   | P=0,4194 |
|                                                                         | WT + Ehrlich + AMG9810 | 8  | 0,9193            | 0,5255  | 5h             | 2,651 (2, 21)           | 0,0941  |                   |           |                                                 |          |
|                                                                         |                        |    |                   |         | 7h             | 1,042 (2, 21)           | 0,3704  |                   |           |                                                 |          |
|                                                                         | WT + Saline            | 10 | 0,9848            | 0,9796  | Baseline       | 3,384 (2, 21)           | 0,0532  | Two-way ANOVA     | Tukey     | Interaction<br>F (8, 84) = 11,25                | P<0,0001 |
|                                                                         |                        |    |                   |         | 0h             | 0,2971 (2, 21)          | 0,7460  |                   |           | Row Factor /<br>Time F (2,583, 54,24) = 8,543   | P=0,0002 |
| <b>Figure 3C</b>                                                        | WT + Ehrlich + vehicle | 10 | 0,8250            | 0,0717  | 1h             | 3,149 (2, 21)           | 0,0637  |                   |           | Colum Factor/<br>Group<br>F (2, 21) = 194,7     | P<0,0001 |
|                                                                         |                        |    |                   |         | 3h             | 1,954 (2, 21)           | 0,1666  |                   |           | Subject<br>F (21, 84) = 1,971                   | P=0,0158 |
|                                                                         | TRPV1 -/- + Ehrlich    | 10 | 0,9450            | 0,6841  | 5h             | 1,530 (2, 21)           | 0,2398  |                   |           |                                                 |          |
|                                                                         |                        |    |                   |         | 7h             | 0,4864 (2, 21)          | 0,6216  |                   |           |                                                 |          |
