# Supplementary material for: Ehrlich Tumor Induces TRPV1-Dependent Evoked and Non-Evoked Pain-like Behavior in Mice
Source: MDPI journal article supplement (doi:10.3390/brainsci12091247), 2022-09-15
Supplement: s1 [file s1]

| <b>Table S2.</b> Statistical information from results shown in Figure 2. |                     |          |                          |                |                       |                                 |                |                          |                  |                                                  |                |
|--------------------------------------------------------------------------|---------------------|----------|--------------------------|----------------|-----------------------|---------------------------------|----------------|--------------------------|------------------|--------------------------------------------------|----------------|
| <b>Result</b>                                                            |                     |          | <b>Shapiro-Wilk test</b> |                | <b>Brown-Forsythe</b> |                                 |                | <b>Statistical tests</b> |                  |                                                  |                |
|                                                                          | <b>Group</b>        | <b>n</b> | <b>W value</b>           | <b>P value</b> | <b>Time points</b>    | <b>F value<br/>F (DFn, DFd)</b> | <b>P value</b> | <b>Test</b>              | <b>Post-Test</b> | <b>F value</b>                                   | <b>P value</b> |
| <b>Figure 2B</b>                                                         | WT + Saline         | 10       | 0,9049                   | 0,3615         | Baseline              | 0,07920 (2, 27)                 | 0,9241         | Two-way ANOVA            | Tukey            | Interaction<br>F (12, 162) = 55,36               | P<0,0001       |
|                                                                          |                     |          |                          |                | 2 days                | 1,546 (2, 27)                   | 0,2315         |                          |                  | Row Factor /<br>Time<br>F (4,901, 132,3) = 67,39 | P<0,0001       |
|                                                                          |                     |          |                          |                | 4 days                | 3,030 (2, 27)                   | 0,0650         |                          |                  |                                                  |                |
|                                                                          | WT + Ehrlich        | 10       | 0,9253                   | 0,5114         | 6 days                | 0,6284 (2, 27)                  | 0,5411         |                          |                  | Colum Factor/<br>Group<br>F (2, 27) = 302,4      | P<0,0001       |
|                                                                          |                     |          |                          |                | 8 days                | 1,745 (2, 27)                   | 0,1938         |                          |                  |                                                  |                |
|                                                                          |                     |          |                          |                | 10 days               | 2,886 (2, 27)                   | 0,0732         |                          |                  | Subject<br>F (27, 162) = 3,314                   | P<0,0001       |
|                                                                          |                     |          |                          |                | 12 days               | 3,346 (2, 27)                   | 0,0503         |                          |                  |                                                  |                |
|                                                                          | TRPV1 -/- + Ehrlich | 10       | 0,8828                   | 0,2392         |                       |                                 |                |                          |                  |                                                  |                |
| <b>Figure 2C</b>                                                         | WT + Saline         | 10       | 0,9848                   | 0,9796         | Baseline              | 2,804 (2, 27)                   | 0,0783         | Two-way ANOVA            | Tukey            | Interaction<br>F (12, 162) = 18,58               | P<0,0001       |
|                                                                          |                     |          |                          |                | 2 days                | 1,083 (2, 27)                   | 0,3527         |                          |                  | Row Factor /<br>Time<br>F (3,919, 105,8) = 18,92 | P<0,0001       |
|                                                                          | WT + Ehrlich        | 10       | 0,8250                   | 0,0717         | 4 days                | 2,042 (2, 27)                   | 0,1494         |                          |                  | Colum Factor/<br>Group<br>F (2, 27) = 211,0      | P<0,0001       |
|                                                                          |                     |          |                          |                | 6 days                | 2,388 (2, 27)                   | 0,1109         |                          |                  |                                                  |                |
|                                                                          |                     |          |                          |                | 8 days                | 2,779 (2, 27)                   | 0,0799         |                          |                  | Subject<br>F (27, 162) = 2,557                   | P=0,0002       |
|                                                                          | TRPV1 -/- + Ehrlich | 10       | 0,9450                   | 0,6841         | 10 days               | 3,102 (2, 27)                   | 0,0613         |                          |                  |                                                  |                |
|                                                                          |                     |          |                          |                | 12 days               | 2,288 (2, 27)                   | 0,1208         |                          |                  |                                                  |                |
|                                                                          |                     |          |                          |                |                       |                                 |                |                          |                  |                                                  |                |

|           |                     |               |        |                                |                     |                 |               |               |                |                                                  |          |                                                  |          |
|-----------|---------------------|---------------|--------|--------------------------------|---------------------|-----------------|---------------|---------------|----------------|--------------------------------------------------|----------|--------------------------------------------------|----------|
| Figure 2D | WT + Saline         | 10            | 0,9671 | 0,8766                         | Baseline            | 1,373 (2, 27)   | 0,2705        | Two-way ANOVA | Tukey          | Interaction<br>F (12, 162) = 80,06               | P<0,0001 |                                                  |          |
|           |                     |               |        |                                | 2 days              | 1,978 (2, 27)   | 0,1579        |               |                |                                                  |          |                                                  |          |
|           |                     |               |        |                                | 4 days              | 2,692 (2, 27)   | 0,0859        |               |                |                                                  |          |                                                  |          |
|           | WT + Ehrlich        | 10            | 0,9219 | 0,4842                         | 6 days              | 2,717 (2, 27)   | 0,0841        |               |                | Row Factor /<br>Time<br>F (2,236, 60,38) = 304,0 | P<0,0001 |                                                  |          |
|           |                     |               |        |                                | 8 days              | 2,472 (2, 27)   | 0,1033        |               |                |                                                  |          |                                                  |          |
|           |                     |               |        |                                | TRPV1 -/- + Ehrlich | 10              | 0,9218        |               |                |                                                  |          | 0,4837                                           | 10 days  |
|           | 12 days             | 3,218 (2, 27) | 0,0558 | Subject<br>F (27, 162) = 5,877 |                     |                 |               |               |                | P<0,0001                                         |          |                                                  |          |
|           |                     |               |        |                                |                     |                 |               |               |                |                                                  |          |                                                  |          |
| Figure 2E | WT + Saline         | 10            | 0,9445 |                                | 0,6041              | n.a.            | 10,59 (2, 27) | 0,0004        | Kruskal-Wallis |                                                  | Dunn     | 19,38                                            | P<0,0001 |
|           | WT + Ehrlich        | 10            | 0,9284 | 0,4327                         |                     |                 |               |               |                |                                                  |          |                                                  |          |
|           | TRPV1 -/- + Ehrlich | 10            | 0,9245 | 0,3957                         |                     |                 |               |               |                |                                                  |          |                                                  |          |
| Figure 2F | WT + Saline         | 10            | 0,9497 | 0,7265                         | Baseline            | 0,05123 (2, 27) | 0,9502        | Two-way ANOVA | Tukey          | Interaction<br>F (12,162) = 12,89                | P<0,0001 |                                                  |          |
|           |                     |               |        |                                | 2 days              | 0,3113 (2, 27)  | 0,7351        |               |                |                                                  |          | Row Factor /<br>Time<br>F (4,498, 121,4) = 36,29 | P<0,0001 |
|           |                     |               |        |                                | 4 days              | 0,1421 (2, 27)  | 0,8682        |               |                |                                                  |          |                                                  |          |
|           | WT + Ehrlich        | 10            | 0,9148 | 0,4298                         | 6 days              | 2,782 (2, 27)   | 0,0797        |               |                | Colum Factor/<br>Group<br>F (2, 27) = 167,7      | P<0,0001 |                                                  |          |
|           |                     |               |        |                                | 8 days              | 3,213 (2, 27)   | 0,0560        |               |                |                                                  |          |                                                  |          |
|           |                     |               |        |                                | TRPV1 -/- + Ehrlich | 10              | 0,9200        |               |                |                                                  |          | 0,4694                                           | 10 days  |
|           | 12 days             | 1,061 (2, 27) | 0,3600 |                                |                     |                 |               |               |                |                                                  |          |                                                  |          |
|           |                     |               |        |                                |                     |                 |               |               |                |                                                  |          |                                                  |          |
